# Supplementary material for: Effects and Mechanism of Bufei Yishen Formula in a Rat Chronic Obstructive Pulmonary Disease Model
Source: Evid Based Complement Alternat Med. 2014 May 14;2014:381976. doi: 10.1155/2014/381976 (PMC4052073; doi:10.1155/2014/381976)
Supplement: Supplementary file 1 — Table S1: DEGs between experimental groups. (A) DEGs between control and COPD groups. (B) DEGs between COPD and BYF groups. Computational method of the DEGs: after microarray experiments, raw image data were converted to CEL and pivot files using Agilent Feature Extraction Software version 10.5.1.1. All downstream microarray analyses were performed using Agilent GeneSpring GX software version 11.0. Microarray datasets were normalized in GeneSpring GX using the Agilent FE one-color scenario (mainly median normalization); Log 2-transformed data were normalized by quantile normalization and used for comparisons. Differentially expressed genes were identified through fold change (|log ratio|>1) and Student's t-test screening (P < 0.05). [file 381976.f1.xls]

## Sheet: Table 1A_DEGs(COPD VS Control)
ProbeName	p-value(COPD_vs_Control)	FCAbsolute(COPD_vs_Control)	regulation(COPD_vs_Control)	COPD_125_NS	COPD_4_NS	COPD_8_NS	COPD_80_NS	COPD_82_NS	COPD_83_NS	Control_107_NS	Control_121_NS	Control_135_NS	Control_148_NS	Control_21_NS	Control_6_NS	GeneSymbol	Description	Chromosome_End_Index_Avadis_	Chromosome_Number_Avadis_	Chromosome_Start_Index_Avadis_	Chromosome_Strand_Avadis_	Cytoband	EnsemblID	EntrezGeneID	GenbankAccession	GeneName	GenomicCoordinates	Go	RefSeqAccession	TIGRID	UniGeneID
A_44_P721823	0.000613	2.56662	up	6.72864	5.61906	5.91006	6.65685	6.38821	6.5809	4.85962	4.40296	5.64129	5.44247	4.46412	4.91403	Zbtb20	Rattus norvegicus zinc finger and BTB domain containing 20 (Zbtb20), mRNA [NM_001105880]	58663757	chr11	58663698	-	rn|11q21	ENSRNOT00000002692	288105	NM_001105880	zinc finger and BTB domain containing 20	chr11:58663757-58663698	GO:0003676|GO:0005634|GO:0005515|GO:0003677|GO:0008270|GO:0005730|GO:0005622	NM_001105880	TC629341	Rn.168502
A_44_P526795	7.41e-05	2.89932	up	7.12721	6.23872	6.65217	7.0393	7.25161	6.91156	5.52389	5.23707	5.10506	6.12823	5.10669	4.90534	Tshz1	PREDICTED: Rattus norvegicus serologically defined colon cancer antigen 33 (predicted) (Sdccag33_predicted), mRNA [XM_225688]	80536369	chr18	80536310	-	rn|18q12.3		307217	XM_225688	teashirt zinc finger homeobox 1	chr18:80536369-80536310	GO:0005634|GO:0043565|GO:0003700|GO:0008270|GO:0060023|GO:0042474|GO:0006355|GO:0005730|GO:0009952|GO:0005622	XM_225688	TC598889	Rn.205514
A_43_P16847	0.00408559	2.0023	down	5.15911	5.93934	5.91055	4.57382	5.08181	5.60213	6.43936	6.10871	6.3186	6.35043	6.15494	6.90468	Spsb1	Rattus norvegicus splA/ryanodine receptor domain and SOCS box containing 1 (Spsb1), mRNA [NM_001107994]	167022503	chr5	167022444	-	rn|5q36	ENSRNOT00000023287	313722	NM_001107994	splA/ryanodine receptor domain and SOCS box containing 1	chr5:167022503-167022444	GO:0004872|GO:0007242	NM_001107994	TC614719	Rn.219023
A_42_P700209	0.0279106	2.20081	up	7.24184	5.8952	7.15722	6.31242	6.82177	5.53185	4.49547	4.94082	6.00945	4.71988	5.3222	6.64428	Slc7a3	Rattus norvegicus solute carrier family 7 (cationic amino acid transporter, y+ system), member 3 (Slc7a3), mRNA [NM_017217]	89159747	chrX	89159688	-	rn|Xq31	ENSRNOT00000005580	29485	NM_017217	solute carrier family 7 (cationic amino acid transporter, y+ system), member 3	chrX:89159747-89159688	GO:0032006|GO:0005886|GO:0055085|GO:0015809|GO:0015189|GO:0015822|GO:0015819|GO:0000064|GO:0015181|GO:0015171|GO:0015326|GO:0006865|GO:0016021	NM_017217	TC576272	Rn.9804
A_44_P197783	0.0122232	2.03304	up	6.05897	5.62978	5.86006	5.58852	5.87993	5.6903	4.04944	5.41995	4.72662	5.687	4.11811	4.56461	Selk	UI-R-DZ1-cni-f-16-0-UI.s1 UI-R-DZ1 Rattus norvegicus cDNA clone UI-R-DZ1-cni-f-16-0-UI 3', mRNA sequence [BQ205389]	5314626	chr16	5314567	-	rn|16p16		290549	BQ205389	selenoprotein K	chr16:5314626-5314567	GO:0006979|GO:0005783			Rn.156559
A_44_P194167	0.0498502	8.16119	up	11.9214	6.04205	6.04205	10.7838	10.3588	6.51227	4.64154	5.39024	9.30498	4.81187	4.53837	4.80063	RT1-Ba	Rat mRNA for RT1.B-1(alpha) chain of integral membrane protein. [X14879]							309621	X14879	RT1 class II, locus Ba		GO:0019882|GO:0005515|GO:0008150|GO:0005886|GO:0042613|GO:0019886|GO:0048002|GO:0005764|GO:0006952|GO:0045582|GO:0003674|GO:0016064|GO:0009897|GO:0050778|GO:0002504|GO:0005575|GO:0042605			Rn.25717
A_43_P11759	0.00646172	2.04711	up	13.6762	12.9558	13.1201	13.2461	13.2357	13.1951	11.9786	12.3167	13.1119	12.5988	11.7557	11.4658	Rps26	Rattus norvegicus ribosomal protein S26 (Rps26), mRNA [NM_013224]	1919212	chr7	1919153	-	rn|7q11	ENSRNOT00000007304	27139	NM_013224	ribosomal protein S26	chr7:1919212-1919153	GO:0005840|GO:0005515|GO:0006414|GO:0008150|GO:0003729|GO:0003735|GO:0003674|GO:0005829|GO:0006412|GO:0015935|GO:0033119|GO:0022627|GO:0005622	NM_013224	TC611421	Rn.135639
A_44_P340345	0.00191804	2.06676	up	12.0868	11.1479	11.3466	12.3564	12.127	12.0999	10.7534	10.9201	11.1924	10.9495	10.459	10.606	Rpl10l	PREDICTED: Rattus norvegicus ribosomal protein L10-like (predicted) (Rpl10l_predicted), mRNA [XM_234245]	87930450	chr6	87930391	-	rn|6q24	ENSRNOT00000047597	299106	XM_234245	ribosomal protein L10-like	chr6:87930450-87930391	GO:0005840|GO:0003735|GO:0005634|GO:0006412|GO:0005737|GO:0007283|GO:0005622	XM_001080201	TC640508	Rn.159753
A_44_P414544	0.044249	2.23579	up	8.5749	9.37095	9.75244	9.06668	7.53078	8.52082	7.62975	9.35286	6.65506	6.8614	7.64244	7.71036	RGD1563231	Rat IgK chain VJ1 region mRNA. [M84148]							502832	M84148	similar to immunoglobulin kappa-chain VK-1				NP069536	Rn.134335
A_44_P421944	0.00829533	2.0846	up	8.15081	7.89745	7.31645	8.97467	8.78954	8.76695	7.1278	7.22227	7.82568	7.61635	6.79442	6.95073	RGD1562724	Rattus norvegicus similar to H3 histone, family 3B (LOC291113), mRNA [XM_225322]	42771347	chr17	42771288	+	rn|17p11	ENSRNOT00000046278	291113	XM_225322	similar to H3 histone, family 3B	chr17:42771288-42771347	GO:0003677|GO:0000786|GO:0006334
A_44_P477954	9.32e-05	3.04508	up	11.8571	10.667	10.8198	11.6421	11.5394	11.5438	9.85153	9.78936	10.2397	9.86026	9.46615	9.22319	RGD1561843	PREDICTED: Rattus norvegicus similar to 60S ribosomal protein L23a (RGD1561843), mRNA [XM_002725453]	2231375	chr1	2231316	-	rn|1p13	ENSRNOT00000045791	308263	XM_002725453	similar to 60S ribosomal protein L23a	chr1:2231375-2231316	GO:0005840|GO:0003735|GO:0006412|GO:0000166|GO:0005622	XM_002725453
A_44_P414838	0.00115114	2.04516	up	10.631	9.74802	9.68433	10.6118	10.4966	10.5404	9.24721	9.41757	9.55914	9.38819	8.95038	8.95643	RGD1561841	PREDICTED: Rattus norvegicus similar to ribosomal protein L31 (RGD1561841), partial mRNA [XM_001055235]	136867479	chr2	136867420	-	rn|2q26	ENSRNOT00000042248	310388	XM_001055235	similar to ribosomal protein L31	chr2:136867479-136867420	GO:0005840|GO:0003735|GO:0006412|GO:0005622	XM_001055235
A_44_P696774	0.000381	2.27555	up	9.68509	8.84215	9.14607	9.177	9.44702	9.16429	8.23603	8.08514	8.52253	8.38477	7.35753	7.75832	Ptpn12	Rattus norvegicus protein tyrosine phosphatase, non-receptor type 12 (Ptpn12), mRNA [NM_057115]	9589758	chr4	9589700	+	rn|4q11	ENSRNOT00000017907	117255	NM_057115	protein tyrosine phosphatase, non-receptor type 12	chr4:9589700-9589758	GO:0005515|GO:0016787|GO:0004721|GO:0005829|GO:0017124|GO:0005737|GO:0042246|GO:0016791|GO:0004725|GO:0005575|GO:0006470	NM_057115	TC611938	Rn.10707
A_43_P15819	0.0275435	2.16443	down	8.32543	7.82225	7.27335	6.35271	7.63464	6.6285	7.81443	8.48156	8.75887	7.31852	9.15633	9.19112	Prss22	Rattus norvegicus protease, serine, 22 (Prss22), mRNA [NM_001106984]	13247713	chr10	13247655	-	rn|10q12	ENSRNOT00000060888	302971	NM_001106984	protease, serine, 22	chr10:13247713-13247655	GO:0006508|GO:0004252|GO:0003824	NM_001106984	TC584105	Rn.137172
A_42_P499767	0.00391874	2.03426	down	8.74415	9.69301	9.57886	8.73827	9.02218	9.88603	9.72976	9.82901	10.7782	10.3504	10.7228	10.3994	Padi2	Rattus norvegicus peptidyl arginine deiminase, type II (Padi2), mRNA [NM_017226]	159805399	chr5	159805340	+	rn|5q36		29511	NM_017226	peptidyl arginine deiminase, type II	chr5:159805340-159805399	GO:0016787|GO:0006464|GO:0005737|GO:0004668|GO:0018101|GO:0005509	NM_017226	TC573898	Rn.98523
A_44_P288091	0.00458594	7.06911	up	8.45304	5.57961	8.0568	5.30043	6.26927	5.38689	2.72623	3.03853	2.51362	5.97792	3.69819	4.16239	P2rx2	Rattus norvegicus purinergic receptor P2X, ligand-gated ion channel, 2 (P2rx2), mRNA [NM_053656]	46488063	chr12	46488004	+	rn|12q16	ENSRNOT00000056694	114115	NM_053656	purinergic receptor P2X, ligand-gated ion channel, 2	chr12:46488004-46488063	GO:0010033|GO:0044424|GO:0005886|GO:0005524|GO:0007528|GO:0045340|GO:0043025|GO:0004931|GO:0030432|GO:0050909|GO:0015276|GO:0033198|GO:0051260|GO:0006811|GO:0014069|GO:0042734|GO:0048741|GO:0050897|GO:0008270|GO:0035091|GO:0019228|GO:0016021|GO:0014832|GO:0007274|GO:0005515|GO:0004872|GO:0048266|GO:0046870|GO:0043197|GO:0016151|GO:0051291|GO:0007268|GO:0043195|GO:0005624|GO:0001666|GO:0003029|GO:…	NM_053656	NP067059	Rn.88799
A_44_P299319	0.00894832	2.18137	up	6.46136	5.65738	5.85571	7.00169	6.64573	6.69365	5.39131	5.4349	5.70381	5.93316	5.03867	4.06225	Olr1174	Rattus norvegicus olfactory receptor 1174 (Olr1174), mRNA [NM_001001016]	18725110	chr8	18725051	+	rn|8q13	ENSRNOT00000049066	405390	NM_001001016	olfactory receptor 1174	chr8:18725051-18725110	GO:0004872|GO:0004984|GO:0005886|GO:0050911|GO:0007186|GO:0016021|GO:0007165	NM_001001016	NP1479033	Rn.143579
A_44_P384389	0.00135398	2.09561	up	9.57797	8.8068	8.93805	9.83282	9.82282	9.8016	8.3795	8.44776	8.72607	8.71037	7.86296	8.24919	LOC691211		171395778	chr1	171395719	-	rn|1q34	ENSRNOT00000050823	691211		similar to Cytochrome c, somatic	chr1:171395778-171395719	GO:0009055|GO:0020037
A_44_P215689	0.0108791	2.27969	down	4.87812	5.71724	4.45701	4.28447	5.99743	4.22755	5.93316	5.27054	6.19534	6.36553	6.41111	6.51914	LOC686934	Rattus norvegicus similar to RIKEN cDNA 1700001E04 (LOC363421), mRNA [XM_343744]	49706741	chr14	49706682	+	rn|14q11	ENSRNOT00000039990	686934	XM_343744	similar to similar to RIKEN cDNA 4930555G01	chr14:49706682-49706741
A_44_P547185	0.0245885	2.03301	down	6.54082	8.2061	8.32235	7.59818	7.75465	8.87713	8.49926	8.62055	9.51769	8.96923	9.13568	8.69853	Igfbp2	Rattus norvegicus insulin-like growth factor binding protein 2 (Igfbp2), mRNA [NM_013122]	71967216	chr9	71967157	+	rn|9q33	ENSRNOT00000023068	25662	NM_013122	insulin-like growth factor binding protein 2	chr9:71967157-71967216	GO:0007568|GO:0032355|GO:0010226|GO:0005515|GO:0005576|GO:0005520|GO:0043567|GO:0005615|GO:0051384|GO:0006950|GO:0016324|GO:0007565|GO:0031995|GO:0007165|GO:0001558|GO:0042493|GO:0031410|GO:0009612|GO:0043627|GO:0031994|GO:0032870|GO:0007584|GO:0032526|GO:0048545	NM_013122	TC616389	Rn.6813
A_44_P1052387	0.00179547	2.08997	up	6.81365	6.46597	6.67209	6.53592	6.7522	6.54641	5.47319	5.13452	5.86333	6.30302	5.5604	5.07088	Hnrpll	PREDICTED: Rattus norvegicus heterogeneous nuclear ribonucleoprotein L-like (predicted) (Hnrpll_predicted), mRNA [XM_233805]	2909099	chr6	2909040	-	rn|6q11		313842	XM_233805	heterogeneous nuclear ribonucleoprotein L-like	chr6:2909099-2909040	GO:0005634|GO:0005515|GO:0003729|GO:0003723|GO:0033120|GO:0006397|GO:0000166		TC622018	Rn.161893
A_42_P614175	0.0245116	2.7194	down	8.35178	8.02599	8.29444	8.31812	8.19979	7.38295	8.57872	8.49063	11.3487	8.87405	9.60478	10.3359	Gal	Rattus norvegicus galanin prepropeptide (Gal), mRNA [NM_033237]	205936489	chr1	205936430	-	rn|1q42	ENSRNOT00000020425	29141	NM_033237	galanin prepropeptide	chr1:205936489-205936430	GO:0007399|GO:0005576|GO:0007218|GO:0006954|GO:0006950|GO:0031943|GO:0030141|GO:0050776|GO:0032868|GO:0050672|GO:0043065|GO:0042493|GO:0005179|GO:0043627|GO:0007631|GO:0005737|GO:0001664|GO:0005794|GO:0008285	NM_033237	TC582795	Rn.8929
A_44_P548440	0.0218156	2.90187	down	7.18483	5.41029	5.07547	6.24207	7.1374	5.4747	7.25271	7.03391	8.29686	9.15535	6.18779	7.82007	Fndc7	Rattus norvegicus fibronectin type III domain containing 7 (Fndc7), mRNA [NM_001107717]	204470570	chr2	204470511	-	rn|2q34	ENSRNOT00000027690	310787	NM_001107717	fibronectin type III domain containing 7	chr2:204470570-204470511		NM_001107717		Rn.218635
A_44_P179165	0.000536	2.21498	up	6.92854	6.6917	6.95767	7.2295	7.38132	7.05745	6.09331	5.86913	5.93054	6.54082	5.21614	5.71249	Fgl2	Rattus norvegicus fibrinogen-like 2 (Fgl2), mRNA [NM_053455]	9177153	chr4	9177094	-	rn|4q11	ENSRNOT00000017232	84586	NM_053455	fibrinogen-like 2	chr4:9177153-9177094	GO:0007567|GO:0005615|GO:0008233|GO:0007165|GO:0005102	NM_053455	TC607670	Rn.64635
A_43_P19999	0.0124685	6.97282	up	8.03773	9.17865	7.08261	10.5541	8.57925	8.86026	4.38247	9.07379	4.11252	5.08349	6.2569	6.57299	Fcrls	Rattus norvegicus Fc receptor-like S, scavenger receptor (Fcrls), mRNA [NM_001107702]	179284119	chr2	179284060	-	rn|2q34	ENSRNOT00000021938	310694	NM_001107702	Fc receptor-like S, scavenger receptor	chr2:179284119-179284060	GO:0005044|GO:0016020|GO:0008150|GO:0003674|GO:0005575	NM_001107702	TC611217	Rn.76819
A_44_P915344	0.0163182	2.62331	down	5.90379	6.86282	6.16444	5.00571	4.19403	5.80663	6.38945	6.02531	7.52362	7.11405	7.46147	7.77184	Emx2	Rattus norvegicus empty spiracles homeobox 2 (Emx2), mRNA [NM_001109169]	266011128	chr1	266011069	+	rn|1q55	ENSRNOT00000012564	499380	NM_001109169	empty spiracles homeobox 2	chr1:266011069-266011128	GO:0010468|GO:0005515|GO:0003700|GO:0021796|GO:0030182|GO:0007420|GO:0021542|GO:0030900|GO:0006355|GO:0042493|GO:0021885|GO:0005634|GO:0043565|GO:0021846|GO:0009952	NM_001109169	TC611500	Rn.16276
A_44_P269582	0.00031	2.03152	up	12.8249	11.9799	12.182	12.8719	12.4494	12.5473	11.1239	11.4345	11.5292	11.9384	11.1646	11.5296	Dusp8	Rattus norvegicus dual specificity phosphatase 8 (Dusp8), mRNA [NM_001108510]	202215964	chr1	202215905	-	rn|1q41	ENSRNOT00000066124	361679	NM_001108510	dual specificity phosphatase 8	chr1:202215964-202215905	GO:0008138|GO:0008150|GO:0003674|GO:0016791|GO:0004725|GO:0005575|GO:0006470	NM_001108510		Rn.219421
A_44_P435945	0.0176227	4.59855	up	10.3037	9.22856	10.1434	8.80576	9.01498	8.9253	5.32511	7.02455	9.51334	8.63112	6.73713	5.98337	Dppa1	Rattus norvegicus developmental pluripotency associated 1 (Dppa1), mRNA [NM_001105905]	31704847	chr10	31702882	-	rn|10q21	ENSRNOT00000067312	689975	NM_001105905	developmental pluripotency associated 1	chr10:31704847-31702882		NM_001105905		Rn.218445
A_43_P15216	0.0186954	2.32378	up	6.35738	5.74208	6.10382	5.77026	6.35614	5.64965	4.52424	4.60755	5.9284	5.75376	4.22261	3.64395	Dolpp1	Rattus norvegicus dolichyl pyrophosphate phosphatase 1 (Dolpp1), mRNA [NM_001106567]	9446212	chr3	9446154	+	rn|3p12	ENSRNOT00000024385	296624	NM_001106567	dolichyl pyrophosphate phosphatase 1	chr3:9446154-9446212	GO:0030176|GO:0016020|GO:0006487|GO:0003824|GO:0047874	NM_001106567	TC583656	Rn.93101
A_44_P379461	0.00054	2.28605	up	10.0061	8.75887	9.51073	9.45987	9.60829	9.29992	8.09697	7.96406	8.89081	8.65099	7.89277	7.99104	Dhx16	Rattus norvegicus DEAH (Asp-Glu-Ala-His) box polypeptide 16 (Dhx16), mRNA [NM_212496]	3009826	chr20	3009770	-	rn|20p12	ENSRNOT00000041405	294232	NM_212496	DEAH (Asp-Glu-Ala-His) box polypeptide 16	chr20:3009826-3009770	GO:0004386|GO:0003676|GO:0008026|GO:0016787|GO:0005524|GO:0000166	NM_212496	TC574609	Rn.6832
A_44_P227243	0.0419846	2.02407	down	5.15343	7.04667	5.89389	5.60775	5.06846	6.16613	5.7902	7.05996	6.68756	6.34141	8.08303	7.07771	Dapl1	Rattus norvegicus death associated protein-like 1 (Dapl1), mRNA [NM_001108582]	41207815	chr3	41207756	+	rn|3q21	ENSRNOT00000007632	362136	NM_001108582	death associated protein-like 1	chr3:41207756-41207815		NM_001108582	TC635889	Rn.23556
A_44_P414273	0.043076	2.45834	down	10.3519	11.4837	9.79256	10.8517	9.83638	11.0998	11.2859	12.7605	11.0394	10.3706	12.4327	13.313	Cox8b	Rattus norvegicus cytochrome c oxidase, subunit VIIIb (Cox8b), nuclear gene encoding mitochondrial protein, mRNA [NM_012786]	201057419	chr1	201057360	-	rn|1q41	ENSRNOT00000019679	25250	NM_012786	cytochrome c oxidase, subunit VIIIb	chr1:201057419-201057360	GO:0042493|GO:0016020|GO:0006123|GO:0005739|GO:0016021|GO:0005743|GO:0004129	NM_012786	TC626850	Rn.10325
A_42_P695401	0.0252614	2.0241	up	9.87323	9.59891	10.2945	11.2065	10.4215	9.67613	8.7004	9.9862	8.85112	9.25945	9.98564	8.18432	Ccl2	Rattus norvegicus chemokine (C-C motif) ligand 2 (Ccl2), mRNA [NM_031530]	70257978	chr10	70257919	+	rn|10q26	ENSRNOT00000009448	24770	NM_031530	chemokine (C-C motif) ligand 2	chr10:70257919-70257978	GO:0050806|GO:0030593|GO:0045471|GO:0048247|GO:0006954|GO:0043025|GO:0010759|GO:0006874|GO:0046677|GO:0031100|GO:0019221|GO:0010332|GO:0031727|GO:0042493|GO:0048010|GO:0009612|GO:0002548|GO:0006916|GO:0060137|GO:0009408|GO:0070098|GO:0009617|GO:0014823|GO:0005576|GO:0005515|GO:0007179|GO:0043200|GO:0006955|GO:0001938|GO:0042466|GO:0005615|GO:0051384|GO:0033552|GO:0032570|GO:0016525|GO:0010574|GO:…	NM_031530	TC582519	Rn.4772
A_42_P636627	0.00993791	2.75804	down	4.94005	5.92081	4.96838	4.63295	4.84812	3.52815	5.12762	5.56387	6.58138	7.29486	6.93517	6.11744	Cartpt	Rattus norvegicus CART prepropeptide (Cartpt), mRNA [NM_017110]	30889928	chr2	30889869	-	rn|2q12	ENSRNOT00000023869	29131	NM_017110	CART prepropeptide	chr2:30889928-30889869	GO:0005515|GO:0000186|GO:0005615|GO:0032099|GO:0007186|GO:0051971|GO:0001678|GO:0050796|GO:0045777|GO:0046850|GO:0070253|GO:0032812|GO:0045779|GO:0008343|GO:0009267|GO:0070093|GO:0001696	NM_017110	TC580637	Rn.89164
A_44_P499372	0.00629781	2.27347	up	7.26314	7.19906	7.07105	6.99841	7.31322	7.45779	5.91114	5.91296	6.64674	6.94775	5.64235	5.13235	Brwd3	Rattus norvegicus similar to WD repeat domain 9 isoform A; cAMP response element binding and beta-tranducin family-like (LOC317213), mRNA [XM_228518]	96980972	chrX	96980802	-	rn|Xq31		317213	XM_228518	bromodomain and WD repeat domain containing 3	chrX:96980972-96980802				Rn.159642
A_44_P385014	0.000296	2.79298	up	6.99254	6.57244	7.09575	7.16157	7.08811	7.97434	5.56981	5.67424	5.26814	6.62135	5.46513	5.39525	Atad2	Rattus norvegicus ATPase family, AAA domain containing 2 (Atad2), mRNA [NM_001134879]	94808674	chr7	94808615	-	rn|7q33	ENSRNOT00000008508	314993	NM_001134879	ATPase family, AAA domain containing 2	chr7:94808674-94808615	GO:0005524|GO:0017111|GO:0000166	NM_001134879	TC582163	Rn.6690
A_44_P1026984	0.0204298	2.07561	down	5.50524	6.23848	5.47433	5.66029	5.65176	5.91938	6.3682	6.58167	8.04454	5.73929	6.79147	7.2455	Asb12	Rattus norvegicus ankyrin repeat and SOCS box-containing 12 (Asb12), mRNA [NM_001037367]	83013944	chrX	83013885	-	rn|Xq31	ENSRNOT00000005663	503446	NM_001037367	ankyrin repeat and SOCS box-containing 12	chrX:83013944-83013885	GO:0007242	NM_001037367	TC578979	Rn.8275
A_44_P389156	0.00149569	2.20681	down	5.32511	6.24836	5.59255	6.16203	6.29912	6.29359	6.97295	7.47936	7.86614	6.95564	6.45985	7.03858	Ankrd56	PREDICTED: Rattus norvegicus ankyrin repeat domain 56 (Ankrd56), mRNA [XM_001070624]	16590068	chr14	16590009	+	rn|14p22	ENSRNOT00000002995	289501	XM_001070624	ankyrin repeat domain 56	chr14:16590009-16590068		XM_001070624
A_44_P837644	0.000148	2.6208	up	8.31029	7.27309	7.73829	7.92614	8.51001	7.76031	6.20467	6.50845	6.86109	6.97465	6.15863	6.47063	Ankfy1	Rattus norvegicus ankyrin repeat and FYVE domain containing 1 (Ankfy1), mRNA [NM_001107018]	59654222	chr10	59654163	+	rn|10q24	ENSRNOT00000021816	303292	NM_001107018	ankyrin repeat and FYVE domain containing 1	chr10:59654163-59654222	GO:0005515|GO:0008270|GO:0010008	NM_001107018	TC604755	Rn.98554
A_42_P515028	0.0211414	2.14272	down	7.45141	7.95679	7.76195	9.44196	8.43953	7.55578	8.76804	9.83009	8.51116	9.61117	8.60009	9.88352	Alpk2	PREDICTED: Rattus norvegicus similar to heart alpha-kinase (predicted) (RGD1564431_predicted), mRNA [XM_574162]	61529799	chr18	61529740	-	rn|18q12.1		498875	XM_574162	alpha-kinase 2	chr18:61529799-61529740	GO:0004674|GO:0005524|GO:0006468		TC592972	Rn.24564
A_44_P335974	0.0425912	2.09947	down	12.8135	12.6926	13.3209	11.1294	11.0924	11.8107	12.9704	13.2376	12.925	12.574	14.2281	13.3447	Aldh1a7	Rattus norvegicus aldehyde dehydrogenase family 1, subfamily A7 (Aldh1a7), mRNA [NM_017272]	223822832	chr1	223822773	-	rn|1q51		29651	NM_017272	aldehyde dehydrogenase family 1, subfamily A7	chr1:223822832-223822773	GO:0004029|GO:0035106|GO:0005829|GO:0018479|GO:0004028|GO:0042802|GO:0005737|GO:0051289|GO:0016491|GO:0042573|GO:0055114	NM_017272	TC576506	Rn.74044
A_43_P19706	0.0382586	3.03463	down	5.3167	5.92255	5.3716	6.07967	5.97354	6.01639	6.30853	8.57538	6.63463	6.58283	6.4835	9.70471	Actn2	Rattus norvegicus actinin alpha 2 (Actn2), mRNA [NM_001170325]	68763955	chr17	68763896	+	rn|17q12.1	ENSRNOT00000024098	291245	NM_001170325	actinin alpha 2	chr17:68763896-68763955	GO:0051370|GO:0042802|GO:0051015|GO:0005730|GO:0005829|GO:0031432|GO:0005856|GO:0005925|GO:0006936|GO:0030374|GO:0048041|GO:0030035|GO:0005576|GO:0005515|GO:0030175|GO:0030018|GO:0051289|GO:0046983|GO:0070080|GO:0005509|GO:0030375|GO:0030864|GO:0031093|GO:0003779|GO:0051374	NM_001170325	TC625047	Rn.3970

## Sheet: Table 1B_DEGs(COPD VS BYF)
ProbeName	p-value(COPD_VS_BYF)	FCAbsolute(COPD_VS_BYF)	regulation(COPD_VS_BYF)	COPD_125_NS	COPD_4_NS	COPD_8_NS	COPD_80_NS	COPD_82_NS	COPD_83_NS	BYF_119_NS	BYF_12_NS	BYF_127_NS	BYF_154_NS	BYF_66_NS	BYF_70_NS	GeneSymbol	Description	Chromosome_End_Index_Avadis_	Chromosome_Number_Avadis_	Chromosome_Start_Index_Avadis_	Chromosome_Strand_Avadis_	Cytoband	EnsemblID	EntrezGeneID	GenbankAccession	GeneName	GenomicCoordinates	Go	RefSeqAccession	TIGRID	UniGeneID
A_44_P721823	0.000352	3.79364	up	6.72864	5.61906	5.91006	6.65685	6.38821	6.5809	3.23068	4.65443	4.60722	4.38877	4.13412	5.32701	Zbtb20	Rattus norvegicus zinc finger and BTB domain containing 20 (Zbtb20), mRNA [NM_001105880]	58663757	chr11	58663698	-	rn|11q21	ENSRNOT00000002692	288105	NM_001105880	zinc finger and BTB domain containing 20	chr11:58663757-58663698	GO:0003676|GO:0005634|GO:0005515|GO:0003677|GO:0008270|GO:0005730|GO:0005622	NM_001105880	TC629341	Rn.168502
A_42_P719221	0.000288	2.65911	down	6.69146	6.70839	7.51643	6.67056	7.01341	6.42993	8.84604	8.45396	7.37646	8.23672	8.41036	8.17229	Vip	Rattus norvegicus vasoactive intestinal peptide (Vip), mRNA [NM_053991]	36369451	chr1	36369392	+	rn|1p11	ENSRNOT00000025477	117064	NM_053991	vasoactive intestinal peptide	chr1:36369392-36369451	GO:0005179|GO:0005576|GO:0007186|GO:0042311	NM_053991	TC590939	Rn.18675
A_44_P526795	0.00856259	4.17772	up	7.12721	6.23872	6.65217	7.0393	7.25161	6.91156	2.67796	4.7114	5.48181	4.1663	5.89948	5.90732	Tshz1	PREDICTED: Rattus norvegicus serologically defined colon cancer antigen 33 (predicted) (Sdccag33_predicted), mRNA [XM_225688]	80536369	chr18	80536310	-	rn|18q12.3		307217	XM_225688	teashirt zinc finger homeobox 1	chr18:80536369-80536310	GO:0005634|GO:0043565|GO:0003700|GO:0008270|GO:0060023|GO:0042474|GO:0006355|GO:0005730|GO:0009952|GO:0005622	XM_225688	TC598889	Rn.205514
A_42_P512838	0.00166344	2.29753	down	10.7111	11.1761	11.332	11.5994	11.1276	10.3745	11.4255	12.019	12.9174	12.1356	12.6426	12.3811	Trem2	Rattus norvegicus triggering receptor expressed on myeloid cells 2 (Trem2), mRNA [NM_001106884]	8059124	chr9	8059065	-	rn|9q12	ENSRNOT00000018351	301227	NM_001106884	triggering receptor expressed on myeloid cells 2	chr9:8059124-8059065	GO:0005886	NM_001106884	TC622789	Rn.106975
A_44_P444247	0.0207843	2.47537	up	5.71505	5.84238	5.89852	4.92844	6.13644	6.16766	4.72338	4.80697	5.4794	2.77299	3.92904	5.13083	Tmf1	Rattus norvegicus TATA element modulatory factor 1 (Tmf1), mRNA [NM_053671]	131888123	chr4	131888064	-	rn|4q34	ENSRNOT00000008143	114206	NM_053671	TATA element modulatory factor 1	chr4:131888123-131888064	GO:0005515	NM_053671	TC575121	Rn.91637
A_43_P21653	0.00811567	2.12415	down	5.11163	6.15413	5.30067	6.31775	6.16341	6.0114	6.70183	8.08416	6.57151	7.04095	6.29912	6.88274	Steap4	Rattus norvegicus STEAP family member 4 (Steap4), mRNA [NM_001044265]	22691952	chr4	22691893	-	rn|4q12	ENSRNOT00000048061	499991	NM_001044265	STEAP family member 4	chr4:22691952-22691893	GO:0005886|GO:0005488|GO:0016491|GO:0006826|GO:0005506|GO:0009055|GO:0045444|GO:0046872|GO:0000139|GO:0008152|GO:0006811|GO:0016021|GO:0055114|GO:0050660|GO:0005794	NM_001044265	NP831246	Rn.16959
A_44_P238495	0.00602222	2.04715	up	8.91273	8.14384	7.87476	8.36486	9.08369	8.75653	7.1491	7.69421	7.7217	7.23163	6.78524	8.35282	Sptbn1	Rattus norvegicus mRNA for short form of beta II spectrin, partial. [AJ242018]							305614	AJ242018	spectrin, beta, non-erythrocytic 1		GO:0005515|GO:0005886|GO:0032437|GO:0030863|GO:0043234|GO:0005730|GO:0007182|GO:0008091|GO:0005634|GO:0016020|GO:0005829|GO:0005200|GO:0005737|GO:0003779|GO:0007184|GO:0032403		NP065384
A_44_P381917	0.00792031	2.46747	down	5.80053	6.94227	6.47063	5.31346	6.3966	6.16542	8.68261	7.72309	6.72409	7.34576	6.64961	7.78196	Sphk1	Rattus norvegicus sphingosine kinase 1 (Sphk1), mRNA [NM_133386]	106644753	chr10	106644694	+	rn|10q32.3	ENSRNOT00000045750	170897	NM_133386	sphingosine kinase 1	chr10:106644694-106644753	GO:0014075|GO:0000287|GO:0005886|GO:0006954|GO:0032651|GO:0005524|GO:0043066|GO:0030335|GO:0005516|GO:0048146|GO:0070555|GO:0033198|GO:0001956|GO:0001934|GO:0005829|GO:0003677|GO:0007205|GO:0001568|GO:0009267|GO:0008284|GO:0005515|GO:0014070|GO:0032026|GO:0045987|GO:0030307|GO:0007420|GO:0007565|GO:0032570|GO:0030424|GO:0004143|GO:0051789|GO:0008481|GO:0070301|GO:0043005|GO:0019371|GO:0045766|GO:…	NM_133386	NP382541	Rn.18522
A_44_P1023480	0.000522	2.00934	up	10.0982	9.38378	10.21	9.38323	9.91493	9.65603	8.41775	8.64996	8.88348	9.09519	8.38448	9.17491	Snrnp48	Rattus norvegicus small nuclear ribonucleoprotein 48k (U11/U12) (Snrnp48), mRNA [NM_001106107]	32820318	chr17	32820259	-	rn|17p12	ENSRNOT00000018508	291060	NM_001106107	small nuclear ribonucleoprotein 48k (U11/U12)	chr17:32820318-32820259	GO:0005689	NM_001106107	TC581593	Rn.39699
A_44_P605002	0.000972	2.57856	up	9.30063	8.16907	8.42886	8.58112	9.57334	8.73105	6.80224	7.29278	8.02273	7.6193	6.98423	7.8634	Slc45a4	PREDICTED: Rattus norvegicus similar to KIAA1126 protein (predicted) (RGD1309971_predicted), mRNA [XM_235397]	111283802	chr7	111283743	-	rn|7q34		315054	XM_235397	solute carrier family 45, member 4	chr7:111283802-111283743		XM_002726935	TC586273	Rn.33421
A_43_P11505	0.00363754	3.10909	down	4.71526	5.72505	5.50931	6.32933	4.65221	5.34002	6.46504	8.26845	5.87348	6.88926	7.11557	7.47836	Serpina3k	Rattus norvegicus serine (or cysteine) peptidase inhibitor, clade A, member 3K (Serpina3k), mRNA [NM_012657]	128379748	chr6	128379688	-	rn|6q32	ENSRNOT00000013896	24794	NM_012657	serine (or cysteine) peptidase inhibitor, clade A, member 3K	chr6:128379748-128379688	GO:0034097|GO:0005576|GO:0043434|GO:0004867|GO:0030414	NM_012657	TC649791	Rn.91257
A_44_P449567	0.00082	3.91234	up	8.62552	7.98542	9.5292	7.50929	8.0462	8.01086	5.64604	6.39224	5.19517	6.74197	6.947	6.9759	Rtn4rl1	Rattus norvegicus reticulon 4 receptor-like 1 (Rtn4rl1), mRNA [NM_181377]	62574276	chr10	62574217	+	rn|10q24	ENSRNOT00000004162	303311	NM_181377	reticulon 4 receptor-like 1	chr10:62574217-62574276	GO:0005515|GO:0004872|GO:0007166|GO:0045121|GO:0046658|GO:0009897	NM_181377	TC589433	Rn.22361
A_43_P11759	0.023797	2.65185	up	13.6762	12.9558	13.1201	13.2461	13.2357	13.1951	11.7819	12.1254	12.623	12.3382	9.69273	12.4257	Rps26	Rattus norvegicus ribosomal protein S26 (Rps26), mRNA [NM_013224]	1919212	chr7	1919153	-	rn|7q11	ENSRNOT00000007304	27139	NM_013224	ribosomal protein S26	chr7:1919212-1919153	GO:0005840|GO:0005515|GO:0006414|GO:0008150|GO:0003729|GO:0003735|GO:0003674|GO:0005829|GO:0006412|GO:0015935|GO:0033119|GO:0022627|GO:0005622	NM_013224	TC611421	Rn.135639
A_44_P340345	0.00115163	2.43611	up	12.0868	11.1479	11.3466	12.3564	12.127	12.0999	10.4495	10.6273	10.8052	10.6713	9.69677	11.2071	Rpl10l	PREDICTED: Rattus norvegicus ribosomal protein L10-like (predicted) (Rpl10l_predicted), mRNA [XM_234245]	87930450	chr6	87930391	-	rn|6q24	ENSRNOT00000047597	299106	XM_234245	ribosomal protein L10-like	chr6:87930450-87930391	GO:0005840|GO:0003735|GO:0005634|GO:0006412|GO:0005737|GO:0007283|GO:0005622	XM_001080201	TC640508	Rn.159753
A_44_P509203	0.0187071	3.335	up	8.5025	6.43434	8.86326	8.4324	6.84755	6.50417	6.68911	4.92126	7.2364	5.49797	6.20288	4.61049	Rnf146	EST221408 Normalized rat placenta, Bento Soares Rattus sp. cDNA clone RPLCF87 3' end, mRNA sequence [AI177765]	29265435	chr1	29265376	-	rn|1p11		308051	AI177765	ring finger protein 146	chr1:29265435-29265376	GO:0005515|GO:0046872|GO:0008270			Rn.167060
A_44_P464221	0.00138823	2.75651	up	11.1989	9.86451	10.2553	10.5264	10.3063	10.43	8.8406	9.29681	9.13717	9.11211	7.76618	9.65147	RGD1566373	PREDICTED: Rattus norvegicus similar to large subunit ribosomal protein L36a (RGD1566373), mRNA [XM_001080446]	23116142	chr20	23116083	+	rn|20p11	ENSRNOT00000047773	365560	XM_001080446	similar to large subunit ribosomal protein L36a	chr20:23116083-23116142	GO:0005840|GO:0003735|GO:0006412|GO:0005622	XM_001080446
A_44_P215544	0.000503	3.5549	up	10.5277	10.0667	9.85315	10.9103	10.5609	10.6513	8.53332	8.89102	9.11438	8.68562	7.26749	9.09929	RGD1565920	PREDICTED: Rattus norvegicus similar to OTTMUSP00000000438 (RGD1565920), mRNA [XM_344713]	85176254	chr18	85176195	-	rn|18q13		364917	XM_344713	similar to OTTMUSP00000000438	chr18:85176254-85176195	GO:0005840|GO:0003735|GO:0006412|GO:0005622	XM_344713
A_44_P288333	0.00110566	2.49655	up	7.88147	6.69972	6.5049	7.34418	7.50687	7.55055	5.34254	6.42895	5.78398	5.70944	5.73713	6.56604	RGD1565560	PREDICTED: Rattus norvegicus similar to ribosomal protein S11 (RGD1565560), mRNA [XM_001060544]	73523851	chr14	73523792	+	rn|14q21	ENSRNOT00000006659	289701	XM_001060544	similar to ribosomal protein S11	chr14:73523792-73523851	GO:0005840|GO:0003735|GO:0006412|GO:0005622	XM_001060544
A_44_P534781	0.00430839	2.37487	up	12.6308	11.4477	11.7445	12.6426	12.1901	12.3788	10.7075	11.3196	11.1939	10.8796	9.7822	11.6644	RGD1564550	PREDICTED: Rattus norvegicus similar to 60S ribosomal protein L35 (RGD1564550), mRNA [XM_220862]	79284440	chr10	79284381	+	rn|10q26	ENSRNOT00000042211	287623	XM_220862	similar to 60S ribosomal protein L35	chr10:79284381-79284440	GO:0005840|GO:0003735|GO:0006412|GO:0005622	XM_220862
A_44_P477954	0.000373	3.26997	up	11.8571	10.667	10.8198	11.6421	11.5394	11.5438	9.52661	10.0153	9.78824	9.59722	8.54486	10.3412	RGD1561843	PREDICTED: Rattus norvegicus similar to 60S ribosomal protein L23a (RGD1561843), mRNA [XM_002725453]	2231375	chr1	2231316	-	rn|1p13	ENSRNOT00000045791	308263	XM_002725453	similar to 60S ribosomal protein L23a	chr1:2231375-2231316	GO:0005840|GO:0003735|GO:0006412|GO:0000166|GO:0005622	XM_002725453
A_44_P414838	0.00397119	2.00514	up	10.631	9.74802	9.68433	10.6118	10.4966	10.5404	9.1941	9.58424	9.60203	9.06996	8.45349	9.78616	RGD1561841	PREDICTED: Rattus norvegicus similar to ribosomal protein L31 (RGD1561841), partial mRNA [XM_001055235]	136867479	chr2	136867420	-	rn|2q26	ENSRNOT00000042248	310388	XM_001055235	similar to ribosomal protein L31	chr2:136867479-136867420	GO:0005840|GO:0003735|GO:0006412|GO:0005622	XM_001055235
A_44_P914096	0.0025612	2.03442	up	14.7393	13.7555	13.9813	14.3524	14.2812	14.2973	13.0963	13.4241	13.3883	13.3356	12.2803	13.7345	RGD1560017	PREDICTED: Rattus norvegicus similar to Ac2-210 (predicted) (RGD1560017_predicted), mRNA [XM_342480]	90223316	chr3	90223257	-	rn|3q32		362181	XM_342480	similar to Ac2-210	chr3:90223316-90223257	GO:0005840|GO:0003735|GO:0015934|GO:0006412|GO:0005622	XM_001073068		Rn.110954
A_44_P206115	0.00269746	2.63947	up	11.3105	10.0748	10.5304	11.1822	10.9929	11.1637	9.13923	9.61787	9.96868	9.45858	8.35153	10.3171	RGD1559963	PREDICTED: Rattus norvegicus similar to 60S ribosomal protein L9 (RGD1559963), mRNA [XM_001061907]	106814627	chr2	106814568	-	rn|2q24		310284	XM_001061907	similar to 60S ribosomal protein L9	chr2:106814627-106814568	GO:0005840|GO:0003735|GO:0006412|GO:0019843	XM_001061907
A_44_P323892	0.00516537	3.03828	up	14.0703	13.4961	13.4183	13.9246	13.7629	13.9178	12.3108	12.6596	12.6384	12.3552	10.4134	12.593	RGD1559951	PREDICTED: Rattus norvegicus similar to 60S ribosomal protein L37a (RGD1559951), mRNA [XM_228717]	22880407	chrX	22880348	-	rn|Xq13		302528	XM_228717	similar to 60S ribosomal protein L37a	chrX:22880407-22880348	GO:0005840|GO:0003735|GO:0006412|GO:0005622	XM_228717
A_44_P321698	0.00439753	2.48084	down	7.38186	7.34552	7.44088	8.31149	7.65858	7.63727	9.81903	9.21888	8.19192	8.19	9.60304	8.6177	RGD1305422	Rattus norvegicus similar to mKIAA0226 protein (LOC303885), mRNA [XM_221382]	69779618	chr11	69779196	+	rn|11q22		303885	XM_221382	similar to mKIAA0226 protein	chr11:69779196-69779618				Rn.198268
A_44_P341910	0.00612687	6.14556	down	7.0945	8.97747	5.094	5.85074	6.67501	5.64604	9.60236	8.6446	9.97856	7.07922	10.5612	9.18906	Retnlg	Rattus norvegicus resistin-like gamma (Retnlg), mRNA [NM_181625]	53175885	chr11	53175372	-	rn|11q21		288135	NM_181625	resistin-like gamma	chr11:53175885-53175372	GO:0005179|GO:0005576|GO:0005125	NM_181625	TC624590	Rn.90340
A_43_P12772	0.0122964	4.06014	down	8.82874	10.3857	8.23056	7.99974	7.78249	8.06328	10.335	9.8798	11.6947	8.62503	12.1554	10.7297	Retnla	Rattus norvegicus resistin like alpha (Retnla), mRNA [NM_053333]	53206665	chr11	53206606	-	rn|11q21	ENSRNOT00000002676	81712	NM_053333	resistin like alpha	chr11:53206665-53206606	GO:0005179|GO:0005576	NM_053333	TC598415	Rn.12120
A_44_P320812	0.0152939	2.36673	up	8.54978	7.19455	8.17475	6.3011	6.87424	6.82803	6.21508	5.91181	6.04628	6.87705	5.54076	5.87411	Rec8	Rattus norvegicus REC8 homolog (yeast) (Rec8), mRNA [NM_001011916]	33760634	chr15	33760141	+	rn|15p13	ENSRNOT00000026430	290227	NM_001011916	REC8 homolog (yeast)	chr15:33760141-33760634	GO:0005515|GO:0007059|GO:0001556|GO:0007141|GO:0007286|GO:0000795|GO:0000794|GO:0000800|GO:0030893|GO:0007129|GO:0001673|GO:0000780|GO:0005634|GO:0007126	NM_001011916	TC576510	Rn.108612
A_44_P247810	0.000721	2.21416	down	6.4898	6.1214	6.88926	5.54359	6.25037	6.17951	7.50591	7.41838	6.66615	7.47473	7.59992	7.6894	Olr327	Rattus norvegicus olfactory receptor 327 (Olr327), mRNA [NM_001000249]	215038571	chr1	215038512	-	rn|1q43	ENSRNOT00000028607	293765	NM_001000249	olfactory receptor 327	chr1:215038571-215038512	GO:0004984|GO:0050911|GO:0007186|GO:0016021	NM_001000249	NP1479314	Rn.141703
A_44_P512896	0.0220318	3.34905	up	7.9579	6.41163	7.69079	4.88841	6.01058	6.19706	2.85583	4.54176	4.68663	5.93029	5.68889	4.99048	Olr1305	Rattus norvegicus olfactory receptor 1305 (Olr1305), mRNA [NM_001000959]	42382608	chr8	42382549	-	rn|8q22	ENSRNOT00000060094	405311	NM_001000959	olfactory receptor 1305	chr8:42382608-42382549	GO:0004984|GO:0050911|GO:0007186|GO:0016021	NM_001000959	TC580520	Rn.143489
A_44_P381770	0.00350546	2.6039	up	6.44071	6.35016	5.38657	7.40181	6.8993	6.96896	5.13083	5.58889	5.45253	4.90772	4.33	5.75352	Olr1130	Rattus norvegicus olfactory receptor 1130 (Olr1130), mRNA [NM_001000428]	17104910	chr8	17104851	-	rn|8q13	ENSRNOT00000061325	300400	NM_001000428	olfactory receptor 1130	chr8:17104910-17104851	GO:0004984|GO:0050911|GO:0007186|GO:0016021	NM_001000428	NP1479009	Rn.143606
A_42_P464055	0.0203904	2.35843	down	6.71042	5.03216	4.63295	6.24115	6.5131	6.36984	7.36415	7.67463	5.89555	7.28915	7.03788	7.66522	Olig2	Rattus norvegicus oligodendrocyte lineage transcription factor 2 (Olig2), mRNA [NM_001100557]	31206967	chr11	31206908	+	rn|11q11	ENSRNOT00000000325	304103	NM_001100557	oligodendrocyte lineage transcription factor 2	chr11:31206908-31206967	GO:0007399|GO:0021530|GO:0005515|GO:0048663|GO:0003700|GO:0005886|GO:0042552|GO:0048709|GO:0003705|GO:0042803|GO:0005730|GO:0006355|GO:0005634|GO:0045665|GO:0048714|GO:0021529|GO:0005737|GO:0000122	NM_001100557	TC641882	Rn.22121
A_44_P356344	0.00124936	2.36154	up	10.7415	9.8059	10.1022	10.6375	10.4774	10.5738	8.51799	9.22484	9.64776	9.02855	8.62007	9.86083	Ndufc2	Rattus norvegicus NADH dehydrogenase (ubiquinone) 1, subcomplex unknown, 2 (Ndufc2), nuclear gene encoding mitochondrial protein, mRNA [NM_001009290]	154641951	chr1	154641288	+	rn|1q32	ENSRNOT00000016509	293130	NM_001009290	NADH dehydrogenase (ubiquinone) 1, subcomplex unknown, 2	chr1:154641288-154641951	GO:0006120|GO:0008137|GO:0005737|GO:0005739|GO:0005743	NM_001009290	TC609082	Rn.62471
A_44_P348244	0.0130906	3.18947	up	7.03737	5.77078	6.51638	6.76407	6.72156	6.25037	5.12826	5.1638	4.96929	2.64362	5.16783	5.94784	Nadsyn1	Glutamine-dependent NAD(+) synthetase (EC 6.3.5.1)(NAD(+) synthase [glutamine-hydrolyzing])(NAD(+) synthetase 1) [Source:UniProtKB/Swiss-Prot;Acc:Q812E8] [ENSRNOT00000028175]	204187526	chr1	204187467	-	rn|1q41	ENSRNOT00000028175	353255	BC101923	NAD synthetase 1	chr1:204187526-204187467	GO:0005515|GO:0008150|GO:0016810|GO:0005524|GO:0000166|GO:0009435|GO:0019674|GO:0003674|GO:0005829|GO:0006807|GO:0003952|GO:0005575|GO:0016874		TC582663	Rn.22886
A_44_P179996	0.0230524	2.64355	up	6.65872	5.69353	6.57531	6.11049	5.79049	5.90207	4.78444	5.21581	5.61003	2.59201	5.21283	4.90064	Myh2	Rattus norvegicus myosin, heavy polypeptide 2, skeletal muscle, adult (Myh2), mRNA [NM_001135157]	53889302	chr10	53889243	+	rn|10q24	ENSRNOT00000004236	691644	NM_001135157	myosin, heavy polypeptide 2, skeletal muscle, adult	chr10:53889243-53889302	GO:0014823|GO:0005515|GO:0031672|GO:0005524|GO:0001778|GO:0043234|GO:0005826|GO:0005730|GO:0030016|GO:0003674|GO:0016459|GO:0005925|GO:0031034|GO:0003774|GO:0005575|GO:0006936|GO:0005794	NM_001135157	TC587553	Rn.10092
A_43_P11783	0.0216767	2.70174	down	4.44317	6.19706	5.75594	4.82598	5.28805	5.22839	6.15831	6.02346	5.66813	7.47125	6.51747	8.5033	Mpz	Rattus norvegicus myelin protein zero (Mpz), mRNA [NM_017027]	87045324	chr13	87045265	+	rn|13q24	ENSRNOT00000004279	24564	NM_017027	myelin protein zero	chr13:87045265-87045324	GO:0005515|GO:0045217|GO:0016020|GO:0016021	NM_017027	TC623012	Rn.8997
A_44_P998060	0.00479952	2.0669	up	8.20179	7.87004	8.0672	7.95214	8.27313	8.30056	6.45629	7.17833	7.73612	6.77976	6.54281	7.68673	Mobkl3	Rattus norvegicus MOB1, Mps One Binder kinase activator-like 3 (yeast) (Mobkl3), mRNA [NM_133528]	53946321	chr9	53946262	+	rn|9q31	ENSRNOT00000020536	171050	NM_133528	MOB1, Mps One Binder kinase activator-like 3 (yeast)	chr9:53946262-53946321	GO:0005515|GO:0046872|GO:0032580|GO:0016020|GO:0005624|GO:0005737|GO:0006810|GO:0005794	NM_133528	TC575436	Rn.12262
A_43_P16626	0.0151836	4.89959	down	7.03595	8.67984	9.77166	6.80663	6.58541	7.50506	12.3626	10.3598	8.09211	9.91318	10.4057	9.00699	Metrn	Rattus norvegicus meteorin, glial cell differentiation regulator (Metrn), mRNA [NM_001009962]	15062395	chr10	15062336	-	rn|10q12	ENSRNOT00000026676	287151	NM_001009962	meteorin, glial cell differentiation regulator	chr10:15062395-15062336	GO:0007399|GO:0005576|GO:0007275|GO:0005615|GO:0050772|GO:0010001	NM_001009962	TC580241	Rn.50391
A_44_P762596	0.00293647	2.05253	up	6.48809	6.88176	6.09693	6.54281	6.77319	7.392	5.60307	4.92621	6.25376	5.89136	5.31698	5.95896	Mars2	PREDICTED: Rattus norvegicus methionine-tRNA synthetase 2 (mitochondrial) (predicted) (Mars2_predicted), mRNA [XM_237156]	54029658	chr9	54029599	+	rn|9q31		316403	XM_237156	methionyl-tRNA synthetase 2, mitochondrial	chr9:54029599-54029658	GO:0005524|GO:0005737|GO:0005759|GO:0005739|GO:0004825|GO:0000166|GO:0006431	XM_237156	TC604877	Rn.9355
A_44_P1005199	0.00147807	3.15689	up	6.27391	5.74663	6.08597	6.0762	6.69768	6.42852	3.92373	4.18273	5.64075	4.57687	3.82888	5.20494	Lrig3	Lrig3 protein [Source:UniProtKB/TrEMBL;Acc:B5DEJ0] [ENSRNOT00000032786]	66062466	chr7	66062407	+	rn|7q22	ENSRNOT00000032786	299830	BC168689	leucine-rich repeats and immunoglobulin-like domains 3	chr7:66062407-66062466	GO:0005515	XM_001055013	TC591483	Rn.204519
A_44_P384389	0.00251474	2.31408	up	9.57797	8.8068	8.93805	9.83282	9.82282	9.8016	7.657	8.40905	8.72068	8.00109	7.69279	9.03681	LOC691211		171395778	chr1	171395719	-	rn|1q34	ENSRNOT00000050823	691211		similar to Cytochrome c, somatic	chr1:171395778-171395719	GO:0009055|GO:0020037
A_44_P525181	0.0323572	2.20112	down	8.09525	9.38667	8.19904	7.00554	8.0801	7.2622	8.64088	9.76898	8.88867	10.2287	9.12366	8.20738	LOC687046	PREDICTED: Rattus norvegicus similar to Glutaredoxin-1 (Thioltransferase-1) (TTase-1) (LOC680444), mRNA [XM_001057210]	5409459	chr15	5407207	+	rn|15p16	ENSRNOT00000061497	687046	XM_001057210	similar to Spetex-2F protein	chr15:5407207-5409459		XM_001054075		Rn.220897
A_44_P511275	0.042621	2.33655	down	7.7436	9.31023	8.29776	6.6595	8.04113	6.88054	8.37625	9.71523	8.75202	10.2902	9.11153	8.03384	LOC685904	PREDICTED: Rattus norvegicus similar to Spetex-2F protein (LOC685904), mRNA [XM_001065695]	60003684	chrUn	60003625	-			685904	XM_001065695	similar to Spetex-2F protein	chrUn:60003684-60003625		XM_001065695
A_44_P333281	0.00282976	2.63277	up	6.60133	6.44679	6.07837	6.94543	7.5281	7.27852	4.41196	5.59512	5.9024	5.41163	4.92028	6.25766	LOC680967	PREDICTED: Rattus norvegicus RAB1A-like protein-like (LOC680967), mRNA [XM_002730137]	55660152	chrUn	55660093	-			680967	XM_002730137	similar to RAB1, member RAS oncogene family	chrUn:55660152-55660093		XM_002730137
A_44_P351684	0.0333739	2.17685	down	9.36972	10.631	9.4724	8.41855	9.3827	8.42418	9.77525	11.0881	10.1313	11.5235	10.3158	9.598	LOC680444	PREDICTED: Rattus norvegicus similar to Glutaredoxin-1 (Thioltransferase-1) (TTase-1) (LOC680444), mRNA [XM_001057210]	5814423	chr15	5813758	+	rn|15p16		680444	XM_001057210	similar to Glutaredoxin-1 (Thioltransferase-1) (TTase-1)	chr15:5813758-5814423	GO:0009055|GO:0015035|GO:0045454	XM_577380		Rn.220897
A_44_P171008	0.0156723	3.01175	up	6.71617	5.57771	5.45904	5.8789	6.10263	6.2528	4.57804	4.34213	4.62019	2.45003	4.5206	5.93265	LOC678918	PREDICTED: Rattus norvegicus similar to NADH dehydrogenase (ubiquinone) 1 beta subcomplex 3 (LOC678918), mRNA [XM_001053805]	40203301	chr18	40203242	-	rn|18q11		678918	XM_001053805	similar to NADH dehydrogenase (ubiquinone) 1 beta subcomplex 3	chr18:40203301-40203242	GO:0008137|GO:0005739	XM_001053805
A_44_P522891	0.0393274	2.34422	down	8.25624	9.1241	8.35673	6.69322	8.07019	6.68471	8.45578	9.75702	8.66301	10.3638	8.95015	8.37008	LOC498468	PREDICTED: Rattus norvegicus similar to Spetex-2C protein (LOC498468), mRNA [XM_573725]	19677967	chr15	19673696	+	rn|15p14		498468	XM_573725	similar to Spetex-2C protein	chr15:19673696-19677967		XM_573738		Rn.220861
A_44_P307308	0.00306134	2.29397	up	11.3839	10.6665	10.6136	11.3902	11.0241	11.1884	9.67302	10.2613	9.98867	9.87168	8.76536	10.5197	LOC301725	PREDICTED: Rattus norvegicus similar to 60S ribosomal protein L35 (LOC301725), mRNA [XM_237568]	105094376	chr9	105094317	-	rn|9q37		301725	XM_237568	similar to 60S ribosomal protein L35	chr9:105094376-105094317	GO:0005840|GO:0003735|GO:0006412|GO:0005622	XM_237568
A_44_P450500	0.00292225	2.09684	up	7.51244	7.35631	7.23185	7.82371	7.82657	7.75746	6.07945	6.63463	7.18302	6.08835	6.01193	7.10168	LOC301231		8302565	chr9	8302506	-	rn|9q12	ENSRNOT00000061678	301231		similar to mitochondrial ribosomal protein L13	chr9:8302565-8302506	GO:0005840|GO:0003735|GO:0006412|GO:0005622
A_44_P234257	0.00099	2.08751	up	13.5634	12.867	12.9371	13.4489	13.1821	13.2013	12.1949	12.3301	12.3902	12.2188	11.2481	12.4469	LOC291686	PREDICTED: Rattus norvegicus similar to 60S ribosomal protein L23a (LOC291686), mRNA [XM_002725324]	26522607	chr18	26522548	+	rn|18p12		291686	XM_002725324	similar to 60S ribosomal protein L23a	chr18:26522548-26522607		XM_002725324
A_44_P377593	0.000946	2.18986	up	9.76482	9.12608	9.18229	9.86451	9.67578	9.61527	8.13011	8.54135	8.80003	8.40247	7.63911	8.93064	LOC100361838	PREDICTED: Rattus norvegicus small nuclear ribonucleoprotein E-like (LOC100361838), mRNA [XM_002725390]	35393400	chr19	35393341	+	rn|19q11		100361838	XM_002725390	small nuclear ribonucleoprotein E-like	chr19:35393341-35393400		XM_002725390
A_43_P23135	0.00223903	2.47518	down	11.7261	10.7302	10.6545	11.3125	10.7964	10.9773	12.4472	13.0557	11.4965	12.2816	12.9756	11.7857	Jph1	Rattus norvegicus junctophilin 1 (Jph1), mRNA [NM_001106630]	1195464	chr5	1195405	+	rn|5q11	ENSRNOT00000008153	297748	NM_001106630	junctophilin 1	chr5:1195405-1195464	GO:0008307|GO:0005792|GO:0030018|GO:0007517	NM_001106630		Rn.211842
A_43_P12570	0.043285	2.30672	up	7.04276	5.74348	6.59607	4.88304	4.99048	5.5762	3.0821	5.0353	5.01173	5.4143	3.79433	5.2592	Il3	Rattus norvegicus interleukin 3 (Il3), mRNA [NM_031513]	39684839	chr10	39684780	-	rn|10q22	ENSRNOT00000031762	24495	NM_031513	interleukin 3	chr10:39684839-39684780	GO:0002763|GO:0050731|GO:0070668|GO:0030097|GO:0043066|GO:0008083|GO:0019221|GO:0042523|GO:0001558|GO:0045740|GO:0009725|GO:0045885|GO:0001934|GO:0033026|GO:0008284|GO:0010468|GO:0005576|GO:0005515|GO:0006955|GO:0005125|GO:0005615|GO:0033028|GO:0010507|GO:0046330|GO:0005135|GO:0005575	NM_031513	TC593383	Rn.10652
A_44_P137545	0.0496192	2.37926	up	6.33798	5.6854	6.42403	5.94621	5.52214	6.5049	6.02378	4.99563	3.16201	5.88571	5.25825	3.59221	Iars	Rattus norvegicus isoleucyl tRNA synthetase mRNA, partial cds and 3' untranslated sequence. [U75923]	20895989	chr17	20895929	+	rn|17p14		306804	U75923	isoleucyl-tRNA synthetase	chr17:20895929-20895989	GO:0004822|GO:0006412|GO:0005829|GO:0005524|GO:0005737|GO:0008270		TC611606	Rn.61745
A_44_P183160	0.00892429	2.53878	up	6.35716	5.32987	5.12826	6.13991	6.14318	6.19866	4.79436	4.54972	5.14328	2.90601	4.9999	4.83896	Hoxc11	Rattus norvegicus similar to Homeobox protein Hox-C11 (LOC366996), mRNA [XM_345881]	141720034	chr7	141719975	+	rn|7q36	ENSRNOT00000021589	366996	XM_001068573	homeobox C11	chr7:141719975-141720034	GO:0001501|GO:0005634|GO:0043565|GO:0003700|GO:0001759|GO:0042733|GO:0009954|GO:0006355|GO:0009952|GO:0001656	XM_001068573		Rn.58550
A_44_P186454	0.0105482	2.15823	up	6.45756	6.54162	6.74089	7.73356	7.32437	6.6455	4.53402	5.78593	6.4641	5.99312	5.71668	6.29055	Hivep1	Rattus norvegicus human immunodeficiency virus type I enhancer binding protein 1 (Hivep1), mRNA [NM_001105751]	28448557	chr17	28448498	-	rn|17p12	ENSRNOT00000019389	117140	NM_001105751	human immunodeficiency virus type I enhancer binding protein 1	chr17:28448557-28448498	GO:0003676|GO:0005634|GO:0005515|GO:0003677|GO:0006357|GO:0008270|GO:0000122|GO:0045892|GO:0016564|GO:0005622	NM_001105751	TC582557	Rn.50740
A_44_P179165	0.000737	2.38241	up	6.92854	6.6917	6.95767	7.2295	7.38132	7.05745	5.42402	5.91588	6.24186	5.36961	5.31088	6.46941	Fgl2	Rattus norvegicus fibrinogen-like 2 (Fgl2), mRNA [NM_053455]	9177153	chr4	9177094	-	rn|4q11	ENSRNOT00000017232	84586	NM_053455	fibrinogen-like 2	chr4:9177153-9177094	GO:0007567|GO:0005615|GO:0008233|GO:0007165|GO:0005102	NM_053455	TC607670	Rn.64635
A_44_P320655	0.00130199	2.90156	up	7.39698	7.04499	7.28104	7.53106	7.93502	7.7947	5.37049	5.62948	6.80131	5.82405	5.35278	6.78471	F2r	Rattus norvegicus coagulation factor II (thrombin) receptor (F2r), mRNA [NM_012950]	25986280	chr2	25986221	-	rn|2q12	ENSRNOT00000024278	25439	NM_012950	coagulation factor II (thrombin) receptor	chr2:25986280-25986221	GO:0045211|GO:0031594|GO:0007596|GO:0046427|GO:0051209|GO:0004930|GO:0051482|GO:0043524|GO:0006954|GO:0005886|GO:0032651|GO:0031094|GO:0000186|GO:0016265|GO:0007260|GO:0030335|GO:0002248|GO:0015057|GO:0006919|GO:0007205|GO:0030168|GO:0051930|GO:0016021|GO:0008284|GO:0008285|GO:0005576|GO:0005515|GO:0004872|GO:0048873|GO:0030194|GO:0005901|GO:0045987|GO:0007186|GO:0045907|GO:0007165|GO:0051928|GO:…	NM_012950	TC574361	Rn.2609
A_44_P420646	0.00159601	2.02634	up	9.9383	9.15936	9.39489	9.65996	9.76461	9.62774	8.10862	8.45028	9.10354	8.63213	8.04208	9.09495	Ergic2	Rattus norvegicus ERGIC and golgi 2 (Ergic2), mRNA [NM_001024984]	185797540	chr4	185797481	-	rn|4q44	ENSRNOT00000002531	297728	NM_001024984	ERGIC and golgi 2	chr4:185797540-185797481		NM_001024984	TC578078	Rn.11521
A_44_P435945	0.0108446	2.01468	down	10.3037	9.22856	10.1434	8.80576	9.01498	8.9253	10.8492	10.4099	10.2623	10.8307	10.0965	10.0364	Dppa1	Rattus norvegicus developmental pluripotency associated 1 (Dppa1), mRNA [NM_001105905]	31704847	chr10	31702882	-	rn|10q21	ENSRNOT00000067312	689975	NM_001105905	developmental pluripotency associated 1	chr10:31704847-31702882		NM_001105905		Rn.218445
A_43_P15216	0.0202175	2.09073	up	6.35738	5.74208	6.10382	5.77026	6.35614	5.64965	3.89372	4.31165	5.98167	5.29814	4.59417	5.51595	Dolpp1	Rattus norvegicus dolichyl pyrophosphate phosphatase 1 (Dolpp1), mRNA [NM_001106567]	9446212	chr3	9446154	+	rn|3p12	ENSRNOT00000024385	296624	NM_001106567	dolichyl pyrophosphate phosphatase 1	chr3:9446154-9446212	GO:0030176|GO:0016020|GO:0006487|GO:0003824|GO:0047874	NM_001106567	TC583656	Rn.93101
A_44_P792281	0.00290727	2.01645	up	9.36229	9.12366	9.17731	9.16476	10.1366	9.98836	8.09816	8.19456	8.79246	8.98541	7.96112	8.85041	Cys1	Rattus norvegicus cystin 1 (Cys1), mRNA [NM_001109597]	42311277	chr6	42311219	-	rn|6q16	ENSRNOT00000008839	690489	NM_001109597	cystin 1	chr6:42311277-42311219	GO:0005932|GO:0035085	NM_001109597	TC602487	Rn.17018
A_42_P675879	0.0417993	2.24911	down	7.02392	8.23154	6.55267	6.80839	5.81019	5.63488	7.08134	7.92802	7.56453	8.65957	8.84701	6.99723	Cyp4f4	Rattus norvegicus cytochrome P450, family 4, subfamily f, polypeptide 4 (Cyp4f4), mRNA [NM_173123]	13309381	chr7	13309322	+	rn|7q11	ENSRNOT00000034309	286904	NM_173123	cytochrome P450, family 4, subfamily f, polypeptide 4	chr7:13309322-13309381	GO:0005792|GO:0009055|GO:0005515|GO:0046872|GO:0016020|GO:0005789|GO:0020037|GO:0004497|GO:0070330|GO:0005783|GO:0055114	NM_173123	TC576314	Rn.10170
A_44_P124592	1.7e-06	3.01014	down	8.01572	8.6436	8.62785	8.34489	8.61309	8.52769	10.1919	10.3321	9.77034	9.67739	10.3745	9.96562	Cyb561	Rattus norvegicus cytochrome b-561 (Cyb561), mRNA [NM_001107056]	95330184	chr10	95330125	-	rn|10q32.1	ENSRNOT00000009778	303601	NM_001107056	cytochrome b-561	chr10:95330184-95330125	GO:0005886|GO:0016021|GO:0005730|GO:0000293	NM_001107056	TC584188	Rn.14673
A_44_P527089	0.0417789	2.56293	down	7.4294	8.79246	9.00083	5.89755	7.00496	7.26409	7.73477	9.28066	8.80318	8.39504	9.71219	9.61019	Calca	Rat alpha-type calcitonin gene-related peptide mRNA, complete cds. [M11597]	172686443	chr1	172686316	-	rn|1q34		24241	M11597	calcitonin-related polypeptide alpha	chr1:172686443-172686316	GO:0007568|GO:0006954|GO:0007528|GO:0032730|GO:0043025|GO:0042311|GO:0031716|GO:0007204|GO:0010523|GO:0043542|GO:0005184|GO:0005634|GO:0045986|GO:0008217|GO:0031645|GO:0001935|GO:0045776|GO:0045778|GO:0007218|GO:0001976|GO:0050965|GO:0048265|GO:0007190|GO:0001944|GO:0030424|GO:0043195|GO:0007159|GO:0032147|GO:0005737|GO:0045779|GO:0005102|GO:0051482|GO:0002027|GO:0008016|GO:0006874|GO:0045762|GO:…		TC602992	Rn.90085
A_44_P385014	0.00146739	2.42271	up	6.99254	6.57244	7.09575	7.16157	7.08811	7.97434	5.38314	5.75327	6.88296	5.56681	5.57246	6.06638	Atad2	Rattus norvegicus ATPase family, AAA domain containing 2 (Atad2), mRNA [NM_001134879]	94808674	chr7	94808615	-	rn|7q33	ENSRNOT00000008508	314993	NM_001134879	ATPase family, AAA domain containing 2	chr7:94808674-94808615	GO:0005524|GO:0017111|GO:0000166	NM_001134879	TC582163	Rn.6690
A_44_P837644	0.000529	2.58712	up	8.31029	7.27309	7.73829	7.92614	8.51001	7.76031	5.78219	6.58059	7.03812	6.25835	6.50823	7.12257	Ankfy1	Rattus norvegicus ankyrin repeat and FYVE domain containing 1 (Ankfy1), mRNA [NM_001107018]	59654222	chr10	59654163	+	rn|10q24	ENSRNOT00000021816	303292	NM_001107018	ankyrin repeat and FYVE domain containing 1	chr10:59654163-59654222	GO:0005515|GO:0008270|GO:0010008	NM_001107018	TC604755	Rn.98554
